# Supplementary material
Source: bioRxiv or medRxiv preprint supplement (https://medrxiv.org/highwire/filestream/70852/field_highwire_adjunct_files/0/2019.12.23.19014407-1.pdf)

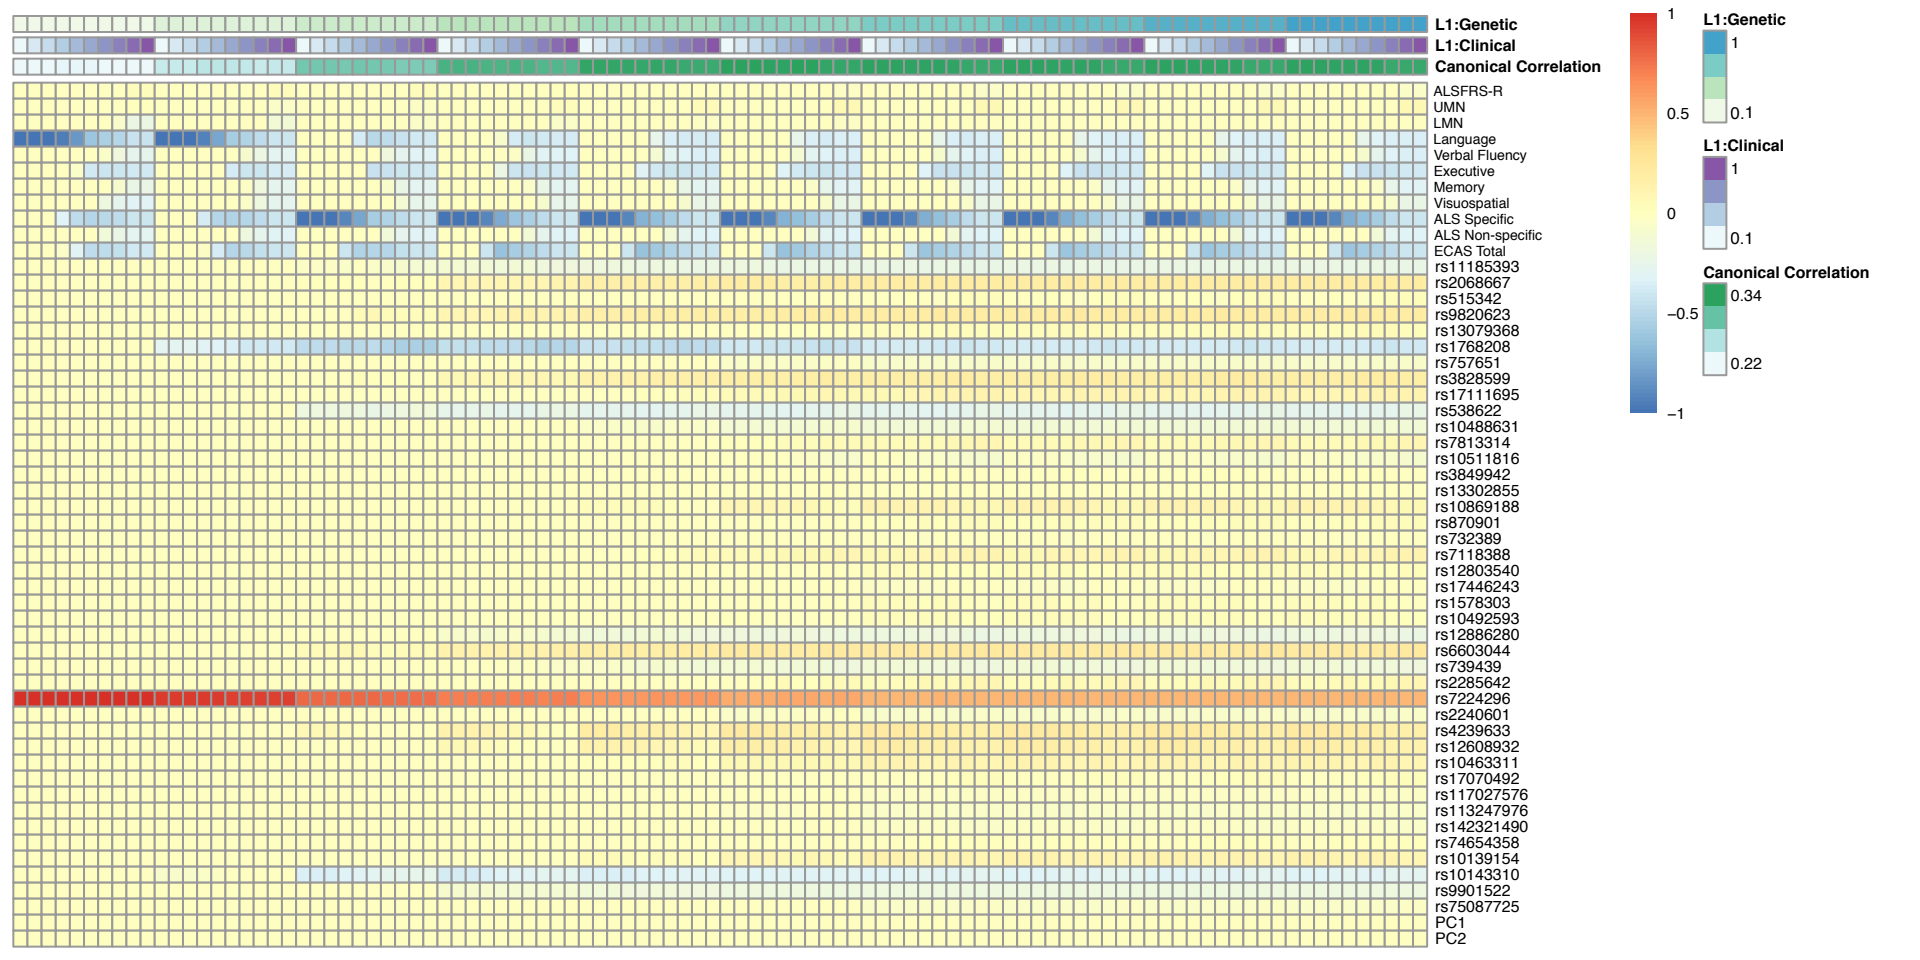

Supplement: Supplementary file [file 2019.12.23.19014407-1.pdf]
